# Supplementary material
Source: PubMed Central journal article supplement (PMC6221223)
Supplement: tpmd180544.SD1.pdf [file tpmd180544.SD1.pdf]

1           **Environmental Determinants of Hemorrhagic Fever with Renal Syndrome in High-risk**  
2           **Counties in China: A Time Series Analysis (2002-2012)**

3  
4 Junyu He<sup>1†</sup>, Jimi He<sup>2†</sup>, Zhihai Han<sup>3,4†</sup>, Yue Teng<sup>5</sup>, Wenyi Zhang<sup>6\*</sup>, Wenwu Yin<sup>7\*</sup>

5 <sup>1</sup> Ocean College, Zhejiang University, Zhoushan, China;

6 <sup>2</sup> School of Science and Engineering, The Chinese University of Hong Kong, Shenzhen, China;

7 <sup>3</sup> Navy General Hospital of PLA, Beijing, People's Republic of China;

8 <sup>4</sup> Navy Clinical College of Anhui Medical University, Hefei, China;

9 <sup>5</sup> State Key Laboratory of Pathogen and Biosecurity, Beijing Institute of Microbiology and Epidemiology, Beijing,  
10 China;

11 <sup>6</sup> Center for Disease Surveillance of PLA, Institute of Disease Control and Prevention of PLA, Beijing, China;

12 <sup>7</sup> Division of Infectious Diseases, Key Laboratory of Surveillance and Early-warning on Infectious Disease,  
13 Chinese Center for Disease Control and Prevention, Beijing, China.

14  
15 <sup>†</sup>These authors contributed equally to this work.

16 Corresponding authors: Wenyi Zhang, Institute of Disease Control and Prevention of PLA, 20 Dong-Da Street, Fengtai District,  
17 Beijing 100071, People's Republic of China. E-mail addresses: zwy0419@126.com

18 Wenwu Yin, Division of Infectious Diseases, Chinese Center for Disease Control and Prevention, 155 Changbai Road, Changping  
19 District, Beijing 102206, China. E-mail addresses: yinww@chinacdc.cn

20  
21  
22 **Supporting Information**

23  
24 Text S1 An example of SARIMA model

25 Text S2 More detailed information of the final four SARIMAX model

26 Table S1 Comparing AIC values of SARIMA models with various structure

27 Table S2 SARIMA model of HFRS cases in four counties from China during 2002-2012

28 Table S3 Information of SARIMAX# model

29 Table S4 Correlation coefficients between HFRS cases and four environmental factors with 0~5 months lags

30 Figure S1 The ACF of residuals of SARIMAX models for (a) Raohe County, (b) Mishan County, (c) Chang'an County  
31 and (d) Hu County

32  
33 Note : Table S1 and Table S4 are listed in the ".xlsx" files naming "Table S1" and "Table S4".

34

35 Text S1 An example of SARIMA model

36

37 Assume the structure of SARIMA model is  $(2,1,1)(0,1,1)_S$ , the Eq 2 becomes

38

$$\Phi_0(B^{12})\phi_2(B)\nabla_{12}^1\nabla^1 Z_t = \Theta_1(B^S)\theta_1(B)\varepsilon_t \quad (\text{S1})$$

39 Through introducing  $\Phi$ ,  $\phi$ ,  $\Theta$ ,  $\theta$ ,  $\nabla$  into Eq. S1, we can obtain the equation as following,

40

$$1 \times (1 - \phi_1 B - \phi_2 B^2)(1 - B^{12})(1 - B)Z_t = (1 - \Theta_1 B^{12})(1 - \theta_1 B)\varepsilon_t$$

41

$$\begin{aligned} \Rightarrow [1 - (1 + \phi_1)B + (\phi_1 - \phi_2)B^2 + \phi_2 B^3 - B^{12} + (1 + \phi_1)B^{13} - (\phi_1 - \phi_2)B^{14} - \phi_2 B^{15}]Z_t \\ = (1 - \theta_1 B - \Theta_1 B^{12} + \theta_1 \Theta_1 B^{13})\varepsilon_t \end{aligned}$$

42

$$\begin{aligned} \Rightarrow Z_t - (1 + \phi_1)Z_{t-1} + (\phi_1 - \phi_2)Z_{t-2} + \phi_2 Z_{t-3} - Z_{t-12} + (1 + \phi_1)Z_{t-13} - (\phi_1 - \phi_2)Z_{t-14} - \phi_2 Z_{t-15} \\ = \varepsilon_t - \theta_1 \varepsilon_{t-1} - \Theta_1 \varepsilon_{t-12} + \theta_1 \Theta_1 \varepsilon_{t-13} \end{aligned}$$

43

$$\begin{aligned} \Rightarrow Z_t = (1 + \phi_1)Z_{t-1} - (\phi_1 - \phi_2)Z_{t-2} - \phi_2 Z_{t-3} + Z_{t-12} - (1 + \phi_1)Z_{t-13} \\ + (\phi_1 - \phi_2)Z_{t-14} + \phi_2 Z_{t-15} + \varepsilon_t - \theta_1 \varepsilon_{t-1} - \Theta_1 \varepsilon_{t-12} + \theta_1 \Theta_1 \varepsilon_{t-13} \quad (\text{S2}) \end{aligned}$$

44 Text S2 More detailed information of the final four SARIMAX model

45

46 The SARIMA parts of Equation 3a~d are shown as follows:

47  $(1-0.8779B)\nabla_{12}^1 Z_t = (1+0.6343B^{12})(1+0.6183B)\varepsilon_t$  (S3a)

48  $(1-0.2764B-0.2364B^2)\nabla_{12}^1 Z_t = (1+0.6179B^{12})\varepsilon_t$  (S3b)

49  $(1-0.4185B)\nabla_{12}^1 Z_t = (1+1.0000B^{12})\varepsilon_t$  (S3c)

50  $(1+0.2864B)\nabla_{12}^1 \nabla^1 Z_t = (1+0.7351B^{12})(1+0.5550B)\varepsilon_t$  (S3d)

51

52 Through expanding the equations above, we can obtain Equations S4a~d, respectively:

53  $Z_t = 0.8779Z_{t-1} + Z_{t-12} - 0.8779Z_{t-13} + \varepsilon_t + 0.6183\varepsilon_{t-1} + 0.6343\varepsilon_{t-12} + 0.3922\varepsilon_{t-13}$  (S4a)

54  $Z_t = 0.2764Z_{t-1} + 0.2364Z_{t-2} + Z_{t-12} - 0.2764Z_{t-13} - 0.2364Z_{t-14} + \varepsilon_t + 0.6179\varepsilon_{t-12}$  (S4b)

55  $Z_t = 0.4185Z_{t-1} + Z_{t-12} - 0.4185Z_{t-13} + \varepsilon_t + \varepsilon_{t-12}$  (S4c)

56  $Z_t = 0.7136Z_{t-1} + 0.2864Z_{t-2} + Z_{t-12} - 0.7134Z_{t-13} - 0.2864Z_{t-14}$   
 $+ \varepsilon_t + 0.5550\varepsilon_{t-1} + 0.7351\varepsilon_{t-12} + 0.4080\varepsilon_{t-13}$  (S4d)

57

58 The standard deviations of  $\varepsilon_t$  for the four equations S3a-S3d are 0.2652, 0.3457, 0.2073 and 0.0003, respectively;

59 while the mean values of  $\varepsilon_t$  for the four equations are zero.

60

Table S2 SARIMA model of HFRS cases in four counties from China during 2002-2012

| County   | Model fitting                 |                  |          |            |         |         |        | Model forecasting |        |         |         |
|----------|-------------------------------|------------------|----------|------------|---------|---------|--------|-------------------|--------|---------|---------|
|          | Model structure               | Model components | Estimate | Std. Error | t value | p value | $R^2$  | AIC               | $R^2$  | RMSE    | MAE     |
| Raohe    | (1,0,1)×(0,1,1) <sub>12</sub> | AR1              | 0.9038   | 0.1006     | 8.9849  | 0.0000  | 0.6490 | 213.9046          | 0.5971 | 2.4189  | 1.4526  |
|          |                               | MA1              | -0.6898  | 0.1723     | -4.0044 | 0.0001  |        |                   |        |         |         |
|          |                               | SMA1             | -0.6895  | 0.1008     | -6.8382 | 0.0000  |        |                   |        |         |         |
| Mishan   | (2,0,0)×(0,1,1) <sub>12</sub> | AR1              | 0.3408   | 0.0967     | 3.5247  | 0.0006  | 0.6390 | 237.1565          | 0.8508 | 1.5569  | 1.2682  |
|          |                               | AR2              | 0.2163   | 0.0947     | 2.2837  | 0.0242  |        |                   |        |         |         |
|          |                               | SMA1             | -0.6265  | 0.0983     | -6.3725 | 0.0000  |        |                   |        |         |         |
| Chang'an | (1,0,0)×(0,1,1) <sub>12</sub> | AR1              | 0.4498   | 0.0865     | 5.1969  | 0.0000  | 0.7780 | 192.3766          | 0.7849 | 18.4786 | 11.8034 |
|          |                               | SMA1             | -1.0000  | 0.1653     | -6.0511 | 0.0000  |        |                   |        |         |         |
| Hu       | (1,1,1)×(0,1,1) <sub>12</sub> | AR1              | -0.3014  | 0.1364     | -2.2093 | 0.0291  | 0.7029 | 184.2755          | 0.7857 | 8.0882  | 5.3127  |
|          |                               | MA1              | -0.5681  | 0.1326     | -4.2846 | 0.0000  |        |                   |        |         |         |
|          |                               | SMA1             | -0.8306  | 0.1426     | -5.8260 | 0.0000  |        |                   |        |         |         |

Table S3 Information of SARIMAX# model

| County   | Model fitting                 |                  |          |            |          |          |        | $R^2$    | AIC |
|----------|-------------------------------|------------------|----------|------------|----------|----------|--------|----------|-----|
|          | Model structure               | Model components | Estimate | Std. Error | t value  | p value  |        |          |     |
| Raohu    | (2,0,1)×(0,1,1) <sub>12</sub> | AR1              | 1.1631   | 0.1283     | 9.0623   | 0.0000   | 0.7512 | 215.2140 |     |
|          |                               | AR2              | -0.1815  | 0.1139     | -1.5932  | 0.1136   |        |          |     |
|          |                               | MA1              | -0.8820  | 0.0733     | -12.0290 | <2.2E-16 |        |          |     |
|          |                               | SMA1             | -0.7647  | 0.1082     | -7.0660  | 0.0000   |        |          |     |
|          |                               | RH_lag4          | 0.0041   | 0.0018     | 2.3416   | 0.0208   |        |          |     |
|          |                               | RAIN_lag1        | 0.0040   | 0.0018     | 2.1793   | 0.0312   |        |          |     |
|          |                               | NDVI_lag1        | 0.0112   | 0.0045     | 2.4963   | 0.0139   |        |          |     |
| Mishan   | (2,0,0)×(0,1,1) <sub>12</sub> | AR1              | 0.2798   | 0.0954     | 2.9339   | 0.0040   | 0.6682 | 246.2721 |     |
|          |                               | AR2              | 0.2246   | 0.0910     | 2.4677   | 0.0149   |        |          |     |
|          |                               | SMA1             | -0.6251  | 0.1020     | -6.1281  | 0.0000   |        |          |     |
|          |                               | RAIN_lag3        | 0.0048   | 0.0022     | 2.2097   | 0.0289   |        |          |     |
|          |                               | RAIN_lag4        | 0.0052   | 0.0023     | 2.2050   | 0.0293   |        |          |     |
| Chang'an | (1,0,0)×(0,1,1) <sub>12</sub> | AR1              | 0.4882   | 0.0815     | 5.9903   | 0.0000   | 0.8423 | 178.3759 |     |
|          |                               | SMA1             | -1.0000  | 0.2225     | -4.4951  | 0.0000   |        |          |     |
|          |                               | RH_lag1          | -0.0209  | 0.0069     | -3.0455  | 0.0028   |        |          |     |
|          |                               | RH_lag5          | 0.0182   | 0.0069     | 2.6241   | 0.0098   |        |          |     |
|          |                               | NDVI_lag2        | 0.0131   | 0.0035     | 3.6907   | 0.0003   |        |          |     |
| Hu       | (1,1,1)×(0,1,1) <sub>12</sub> | AR1              | -0.1807  | 0.1480     | -1.2208  | 0.2244   | 0.7790 | 191.3398 |     |
|          |                               | MA1              | -0.6384  | 0.1313     | -4.8621  | 0.0000   |        |          |     |
|          |                               | SMA1             | -0.7379  | 0.1121     | -6.5839  | 0.0000   |        |          |     |
|          |                               | RH_lag5          | 0.0163   | 0.0068     | 2.3853   | 0.0185   |        |          |     |

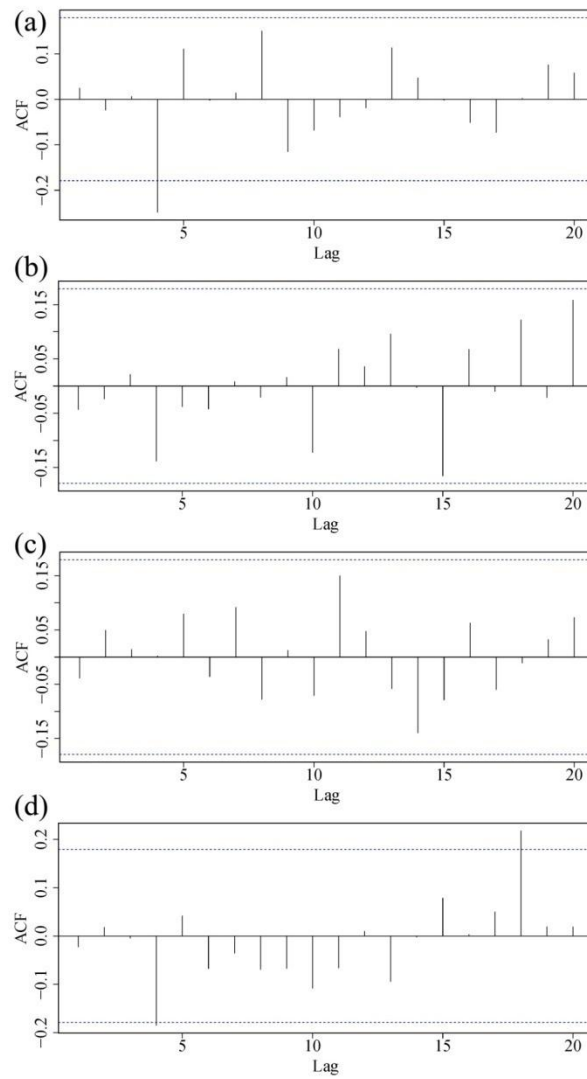

Figure S1 The ACF of residuals of SARIMAX models for (a) Raohe County, (b) Mishan County, (c) Chang'an County and (d) Hu County
